# Supplementary material for: Effects of codeine on pregnancy outcome: results from a large population-based cohort study
Source: PubMed Central journal article supplement — Eur J Clin Pharmacol. 2011 Jun 9;67(12):1253–61. doi: 10.1007/s00228-011-1069-5 (PMC3214255; doi:10.1007/s00228-011-1069-5), 2011-06-09
Supplement: 228_2011_1069_MOESM1_ESM.pdf [file 228_2011_1069_MOESM1_ESM.pdf]

## SUPPLEMENTAL DIGITAL CONTENT 1: PREDICTORS (CONFOUNDING FACTORS) INCLUDED IN THE LOGISTIC REGRESSION ANALYSES.

**The effects of codeine on pregnancy outcome: results from a large population-based cohort study.**

**Kateřina Nezvalov-Henriksen · Olav Spigset · Hedvig Nordeng**

**Eur J Clin Pharmacol**

K. Nezvalov-Henriksen (✉)

Department of Social Pharmacy, Institute of Pharmacy, Faculty of Mathematics and Natural Sciences, University of Oslo,

Sem Selands vei 3, 0316 Oslo, Norway

e-mail: [katerina.nezvalova-henriksen@farmasi.uio.no](mailto:katerina.nezvalova-henriksen@farmasi.uio.no)

**Congenital malformations (any and major):** maternal age \* parity (interaction), use of potentially teratogenic drugs (not listed in table 3), number of ultrasound visits, polyhydramnios.

**Live birth:** maternal age, plurality, BMI, proteinuria, abruptio placentae, musculoskeletal pain before pregnancy (any), musculoskeletal pain during pregnancy (acute), congenital malformations (any), acute cesarean delivery.

**Low birth weight:** low gestational age \* plurality (interaction), parity, BMI, smoking throughout pregnancy, high blood pressure during the first trimester, preeclampsia, abruptio placentae, polyhydramnios.

**Low gestational age:** maternal age \* parity (interaction), plurality, education, BMI, folic acid intake prior to pregnancy, alcohol intake during pregnancy, proteinuria, high blood pressure during the first trimester, hospitalization, vaginal bleeding, number of ultrasound visits, placenta previa, abruptio placentae, oligohydramnios, polyhydramnios, asthma, cardiac disease, musculoskeletal pain before pregnancy (any).

**Low APGAR score at 1 minute:** low birth weight \* low gestational age (interaction), acute cesarean delivery, atonic uterus \* prolonged labor (interaction), respiratory disorder in the newborn, newborn admitted to intensive care unit, hypoglycemia in the newborn, parity, plurality, BMI, number of ultrasound visits, abruptio placentae, polyhydramnios, oligohydramnios.

**Low APGAR score at 5 minutes:** low birth weight \* low gestational age (interaction), acute cesarean delivery, atonic uterus \* prolonged labor (interaction), respiratory disorder in the newborn, newborn admitted to intensive care unit, hypoglycemia in the newborn, parity, plurality, BMI, sick-leave, number of ultrasound visits, abruptio placentae, polyhydramnios, oligohydramnios.

**Atonic uterus:** prolonged labor, parity, plurality, smoking throughout pregnancy, BMI, preeclampsia, vaginal bleeding, placenta previa, abruptio placentae, polyhydramnios, number of ultrasound visits.

**Prolonged labor:** high birth weight (not listed in table 4), high gestational age (not listed in table 4), foetal malpresentation (not listed in table 3), epidural analgesia (not listed in table 3/4).

**Postpartum hemorrhage:** atonic uterus \* prolonged labor (interaction), cesarean delivery, induction of labor (not listed in table 4), epidural analgesia (not listed in table 3/4), third or fourth grade perineal tears (not listed in table 4) \* high birth weight (not listed in table 4) (interaction), BMI, maternal age \* plurality (interaction), preeclampsia and/or eclampsia, vaginal bleeding during pregnancy, number of ultrasound visits, placenta previa, abruptio placentae.

**Respiratory disorder in the newborn:** parity, plurality, BMI, alcohol intake during pregnancy, hospitalization, number of ultrasound visits, placenta previa, abruptio placentae, oligohydramnios, polyhydramnios, asthma, diabetes, musculoskeletal pain before pregnancy (any), musculoskeletal pain during pregnancy (acute), non-narcotic analgesic use, psychotropic agent use.

**Admission of newborn to intensive care unit:** low birth weight \* low gestational age (interaction), parity, BMI, sick-leave, alcohol intake during pregnancy, number of ultrasound visits, abruptio placentae, polyhydramnios, diabetes, use of psychotropic agents, use of possibly teratogenic agents (not listed in table 3).

**Planned cesarean delivery:** foetal malpresentation, placenta previa, suspected pregnancy complication(s) revealed by ultrasound (not listed in table 3) \* number of ultrasound visits (interaction), maternal age \* parity (interaction), plurality, psychotropic agent use.

**Acute cesarean delivery:** atonic uterus \* prolonged labor, diabetes, placenta previa, abruptio placentae, oligohydramnios, polyhydramnios, number of ultrasound visits, hospitalization, preeclampsia, BMI, plurality, parity, maternal age, use of potentially teratogenic agents (not listed in table 3), high birth weight (not listed in table 4).

**Hypoglycemia in the newborn:** maternal age, parity, plurality, BMI, smoking throughout pregnancy, high blood pressure during the first trimester, proteinuria, preeclampsia, number of ultrasound visits, abruptio placentae, polyhydramnios, oligohydramnios, diabetes, arthritis/SLE/fibromyalgia.
